# Supplementary material for: A facile route to realize the copolymerization of l-lactic acid and ε-caprolactone: sulfonic acid-functionalized Brønsted acidic ionic liquids as both solvents and catalysts
Source: Royal Society of Chemistry journal article supplement (doi:10.1039/c3gc42477d), 2014-01-01
Supplement: c3gc42477d.pdf [file c3gc42477d.pdf]

## Supporting information

# **A Facile Route to Realize the Copolymerization of L-Lactic Acid and $\epsilon$ -Caprolactone: Sulfonic Acid-functionalized Brønsted Acidic Ionic Liquids as both solvents and catalysts**

Qiaohong Peng, Khalid Mahmood, Ying Wu, Leli Wang, Yanyan Liang, Jianan Shen and  
Zhengping Liu\*

Institute of Polymer Chemistry and Physics of College of Chemistry,

BNU Lab of Environmentally Friendly and Functional Polymer Materials,

Beijing Key Laboratory of Energy Conversion and Storage Materials,

Beijing Normal University, Beijing 100875, PR China

Tel.:+86 10 58806896; fax:+86 10 58802075.E-mail address: lzp@bnu.edu.cn.

**[BSMIM][TFS]** Anal. Calc. for  $C_9H_{15}F_3N_2O_6S_2$ : C, 29.35, H, 4.10, N, 7.61; Found: C, 28.58, H, 5.552, N, 7.308.  $^1H$  NMR (400 MHz, DMSO)  $\delta$  9.13 (s, 1H), 7.77 (s, 1H), 7.70 (s, 1H), 4.18 (t,  $J = 7.0$  Hz, 2H), 3.85 (s, 3H), 2.53 (2H), 1.98 – 1.75 (m, 2H), 1.65 – 1.41 (m, 2H).  $^{13}C$  NMR (400 MHz, DMSO)  $\delta$  135.93 (s), 123.36 (s), 122.00 (s), 121.70 (s), 118.51 (s), 50.03 (s), 48.48 (s), 35.53 (s), 28.09 (s), 21.07 (s).

**[BSMIM][HSO<sub>4</sub>]** Anal. Calc. for  $C_8H_{16}N_2O_7S_2$ : C, 30.37; H, 5.10; N, 8.86; Found: C, 29.23, H, 7.018, N, 8.368.  $^1H$  NMR (400 MHz, DMSO)  $\delta$  9.14 (s, 1H), 7.77 (s, 1H), 7.71 (s, 1H), 5.99 (s, 7H), 4.18 (t,  $J = 6.8$  Hz, 2H), 3.85 (s, 3H), 2.48 (2H), 1.98 – 1.75 (m, 2H), 1.55 (dd,  $J = 14.5$ , 7.3 Hz, 2H).  $^{13}C$  NMR (400 MHz, DMSO)  $\delta$  135.81 (s), 123.34 (s), 121.95 (s), 49.98 (s), 48.47 (s), 35.51 (s), 28.00 (s), 20.96 (s).

**[BSMIM][TS]** Anal. Calc. for  $C_{15}H_{22}N_2O_6S_2$ : C, 41.59, H, 6.906, N, 6.294; Found: C, 46.14, H, 5.68, N, 7.17.  $^1H$  NMR (400 MHz, DMSO)  $\delta$  9.14 (s, 1H), 7.77 (s, 1H), 7.70 (s, 1H), 7.48 (d,  $J = 7.4$  Hz, 2H), 7.12 (d,  $J = 7.5$  Hz, 2H), 5.85 (s, 4H), 4.18 (t,  $J = 6.4$  Hz, 2H), 3.85 (s, 3H), 2.44 (2H), 2.29 (s, 3H), 1.98 – 1.75 (m, 2H), 1.55 (d,  $J = 6.8$  Hz, 2H).  $^{13}C$  NMR (400 MHz, DMSO)  $\delta$  142.65 (s), 139.61 (s), 135.80 (s), 128.56 (s), 125.26 (s), 123.33 (s), 121.95 (s), 50.00 (s), 48.47 (s), 35.51 (s), 28.04 (s), 21.00 (s), 20.55 (s).

**[BSMIM][MS]** Anal. Calc. for  $C_9H_{18}N_2O_6S_2$ : C, 34.38; H, 5.77; N, 8.91; Found: C, 33.91, H, 5.009, N, 8.767.  $^1H$  NMR (400 MHz, DMSO)  $\delta$  9.14 (s, 1H), 7.77 (s, 1H), 7.71 (s, 1H), 4.18 (t,  $J = 6.9$  Hz, 2H), 3.85 (s, 3H), 2.46 (2H), 2.39 (s, 3H), 1.98 – 1.75 (m, 2H), 1.54 (dt,  $J = 14.8$ , 7.5 Hz, 2H).  $^{13}C$  NMR (400 MHz, DMSO)  $\delta$  135.94 (s), 123.38 (s), 122.01 (s), 50.04 (s), 48.47 (s), 39.13 (s), 37.90 (s), 35.55 (s), 28.10 (s), 21.07 (s).

**[BSMIM][BF<sub>4</sub>]** Anal. Calc. for C<sub>8</sub>H<sub>15</sub>BF<sub>4</sub>N<sub>2</sub>O<sub>3</sub>S: C, 31.39, H, 4.94, N, 9.15; Found: C, 32.09, H, 5.950, N, 9.303. <sup>1</sup>H NMR (400 MHz, DMSO) δ 9.13 (s, 1H), 7.77 (s, 1H), 7.70 (s, 1H), 4.18 (t, J = 6.9 Hz, 2H), 3.85 (s, 3H), 2.46 (2H), 1.98 – 1.75 (m, 2H), 1.65 – 1.41 (m, 2H). <sup>13</sup>C NMR (400 MHz, DMSO) δ 135.93 (s), 123.35 (s), 121.99 (s), 50.04 (s), 48.47 (s), 35.52 (s), 28.08 (s), 21.07 (s).

**[BSPy][HSO<sub>4</sub>]** <sup>1</sup>H NMR (400 MHz, DMSO) δ 9.10 (d, J = 5.5 Hz, 2H), 8.61 (t, J = 7.8 Hz, 1H), 8.17 (t, J = 7.8 Hz, 2H), 4.63 (t, J = 7.3 Hz, 2H), 2.10 – 1.94 (m, 2H), 1.64 – 1.52 (m, 2H).

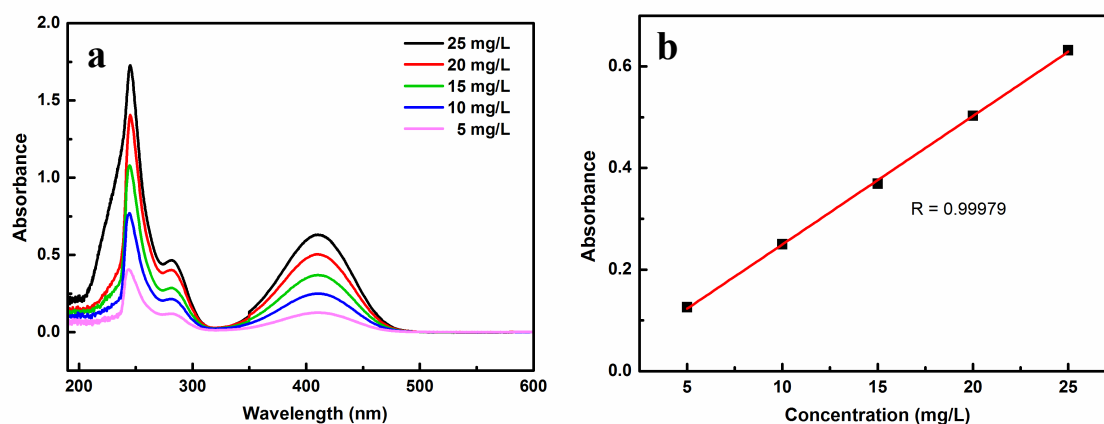

**Fig. S1** (a) UV-Vis spectra of 2,4-dichloro-6-nitroaniline chloroform solutions with different concentration; (b) The intensities based on the absorption maximum from each curve in the UV-Vis spectra for the different concentration of 2,4-dichloro-6-nitroaniline chloroform solution.

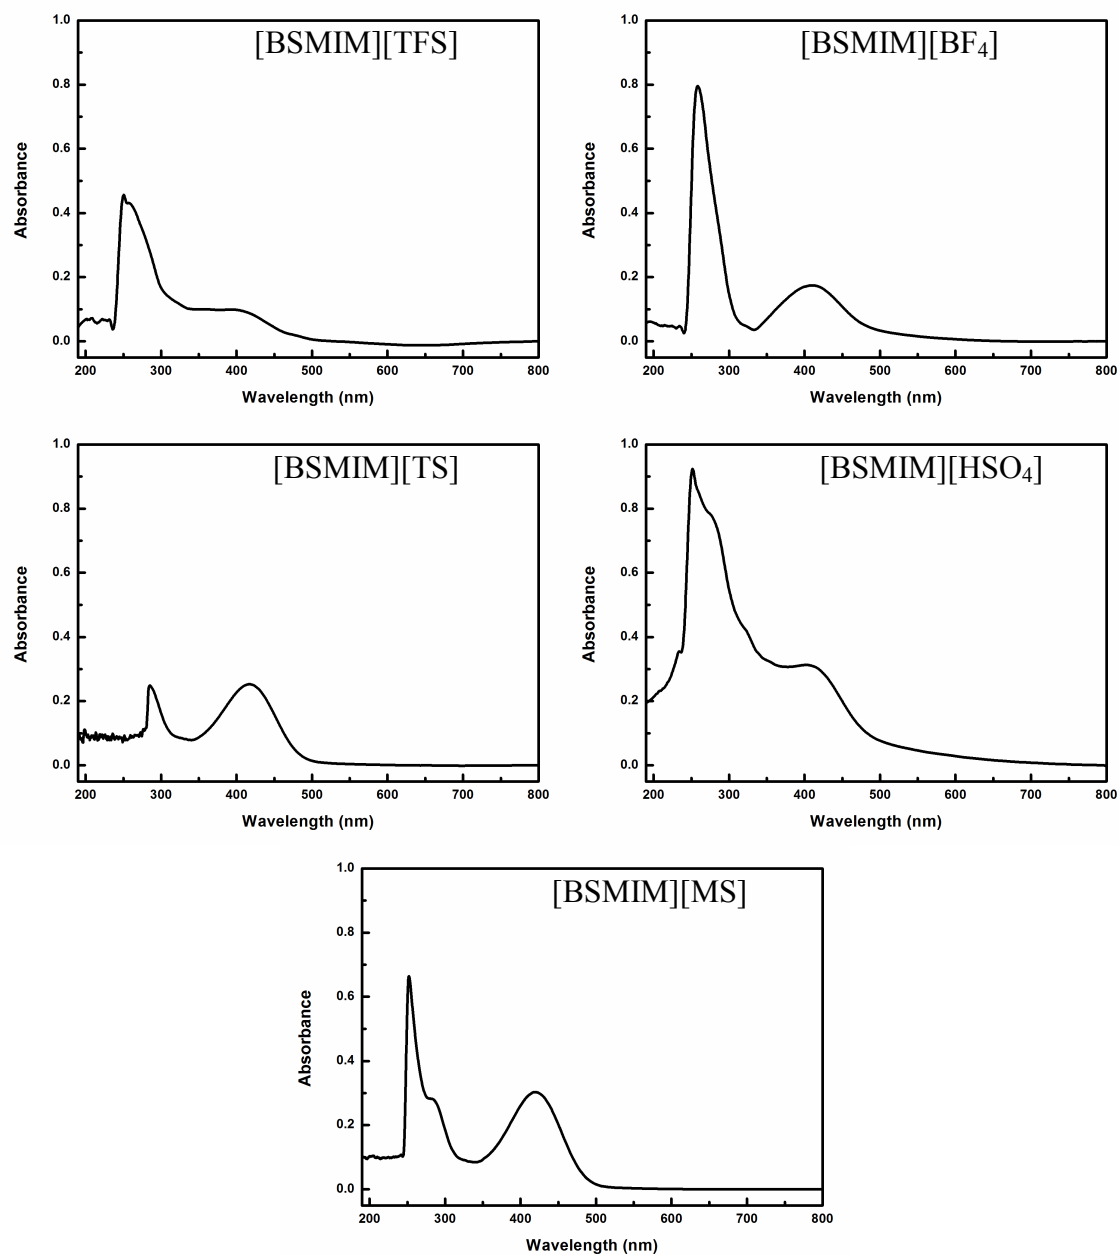

**Fig. S2** UV-Vis spectra of 2,4-dichloro-6-nitroaniline in different sulfonic acid-functionalized Brønsted acidic ionic liquids (50 °C, 25 mg/L).

**Table S1**  $H_0$  values of SFBAILs determined by UV-Vis spectroscopy at 50 °C.

| SFBAILs                    | Cations                                                                           | Anions                                                                                 | [I] <sup>-</sup> % | [IH <sup>+</sup> ] <sup>+</sup> % | $H_0^a$ |
|----------------------------|-----------------------------------------------------------------------------------|----------------------------------------------------------------------------------------|--------------------|-----------------------------------|---------|
| [BSMIM][TFS]               |                                                                                   | CF <sub>3</sub> SO <sub>3</sub> <sup>-</sup>                                           | 14                 | 86                                | -4.1    |
| [BSMIM][BF <sub>4</sub> ]  |                                                                                   | BF <sub>4</sub> <sup>-</sup>                                                           | 28                 | 72                                | -3.7    |
| [BSMIM][TS]                | 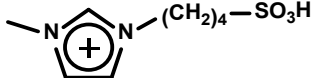 | <i>p</i> -CH <sub>3</sub> (C <sub>6</sub> H <sub>4</sub> )SO <sub>3</sub> <sup>-</sup> | 41                 | 59                                | -3.5    |
| [BSMIM][HSO <sub>4</sub> ] |                                                                                   | HSO <sub>4</sub> <sup>-</sup>                                                          | 48                 | 52                                | -3.3    |
| [BSMIM][MS]                |                                                                                   | CH <sub>3</sub> SO <sub>3</sub> <sup>-</sup>                                           | 48                 | 52                                | -3.3    |

<sup>a</sup> The acidities of SFBAILs were determined using the Hammett method with UV-Vis spectroscopy at 50 °C, 25 mg/L of 2,4-dichloro-6-nitroaniline as indicator.

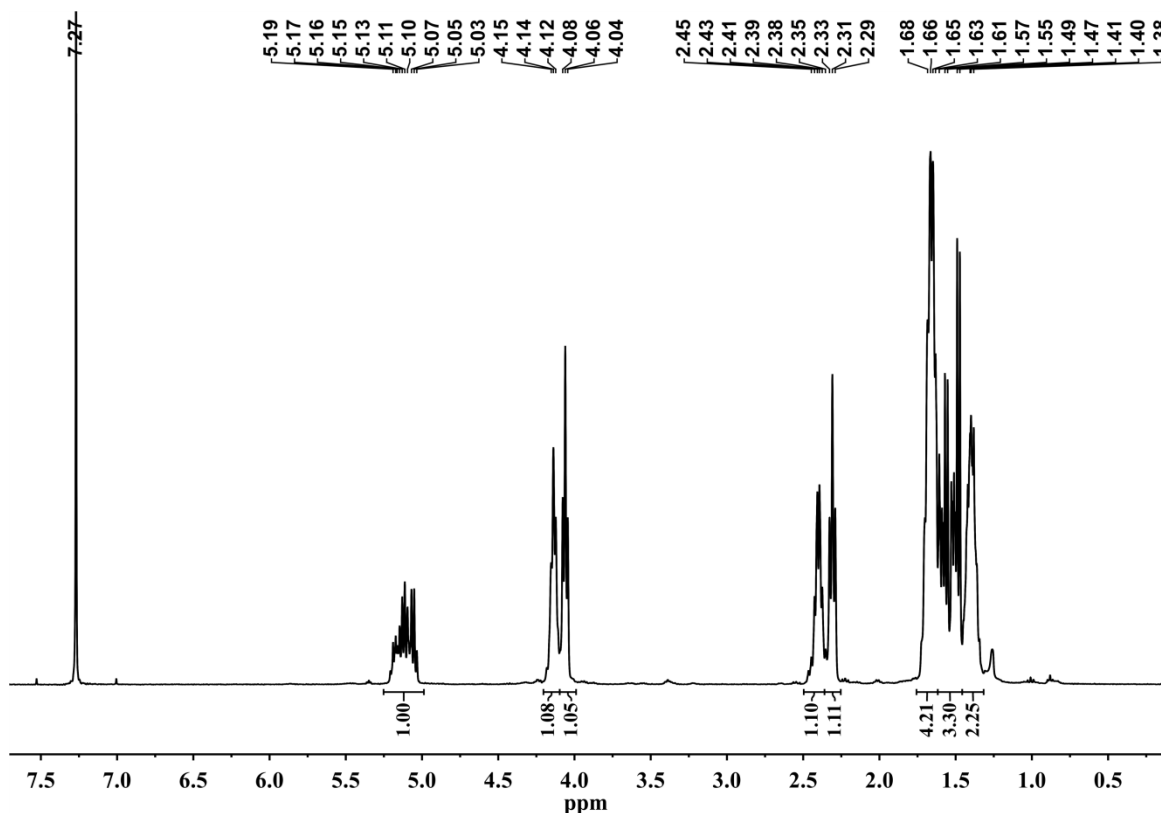

**Fig. S3** <sup>1</sup>H NMR spectrum of PLLA-CL copolymer by blowing dry air (with an initial monomer ratio of 1:1).

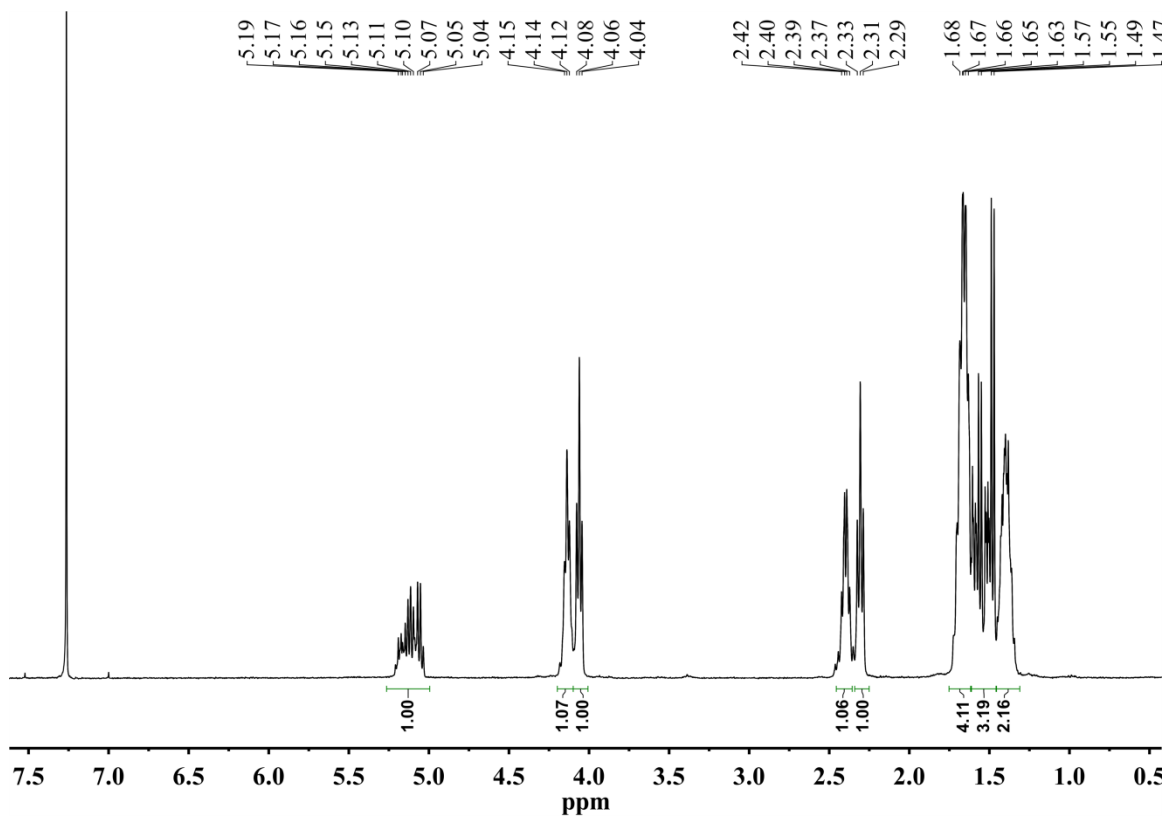

**Fig. S4**  $^1\text{H}$  NMR spectrum of PLLA-CL copolymer (with an initial monomer ratio of 1:1).

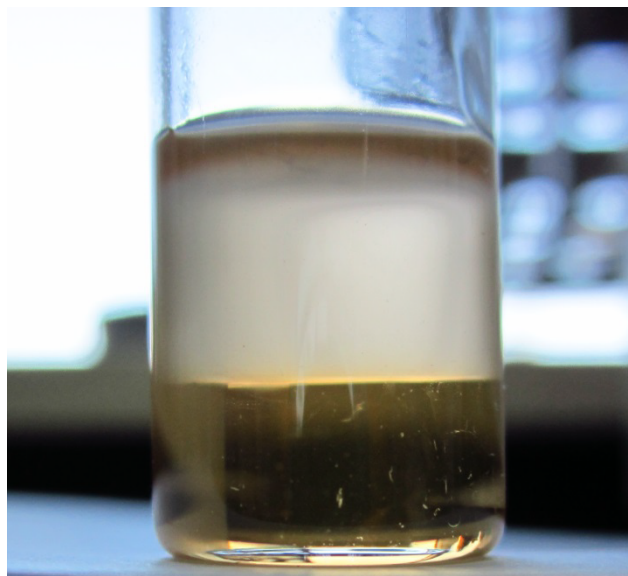

**Fig. S5** Digital photo image of polymerization mixture after phase separation (upper phase for PLLA-CL copolymer, lower phase for [BSMIM][TFS]).

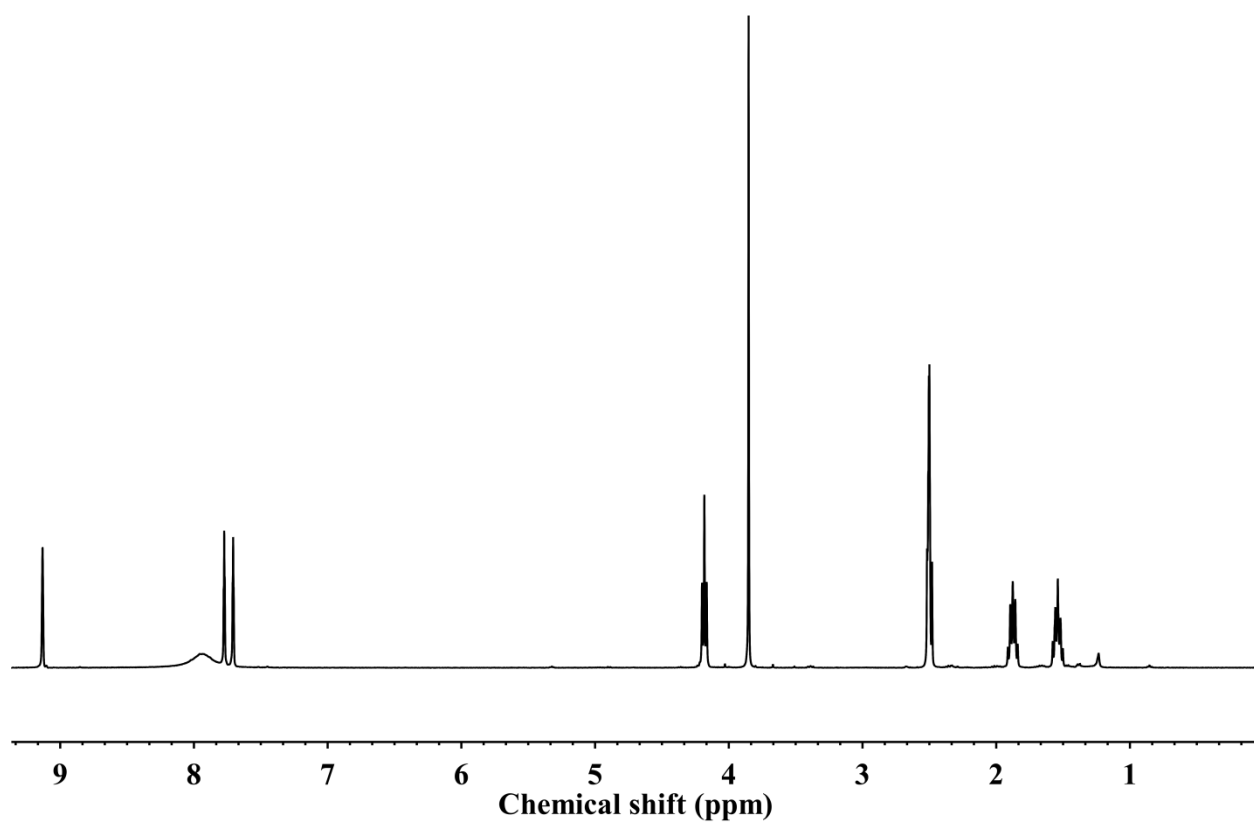

**Fig. S6**  $^1\text{H}$  NMR spectrum of recycled [BSMIM][TFS].
